# Supplementary material for: Acupuncture and moxibustion for chronic fatigue syndrome in traditional Chinese medicine: a systematic review and meta-analysis
Source: PubMed Central journal article supplement (PMC5363012; doi:10.1186/s12906-017-1647-x), 2017-03-23
Supplement: 12906_2017_1647_MOESM1_ESM.pdf [file 12906_2017_1647_MOESM1_ESM.pdf]

Table S1. The characteristics of included studies

| No. | Study(first suthor) | Year | Sample size  | age    | Intervention group                   | Control group<br>(the third group for three-arm trial) | Treatment<br>duration (days) | Adverse<br>events |
|-----|---------------------|------|--------------|--------|--------------------------------------|--------------------------------------------------------|------------------------------|-------------------|
| 1   | Jiaxuan Xiong       | 2005 | 87(43/44)    | 18-60  | electroacupuncture                   | <i>liuweidihuangwan</i>                                | 20                           | 5                 |
| 2   | Aisong Guo          | 2007 | 65(33/32)    | 21-49  | moxibustion                          | fluoxetine                                             | 30                           |                   |
| 3   | Debin Zhang         | 2007 | 60(30/30)    | 21-59  | acupuncture,moxibustion              | acupuncture                                            | 30                           |                   |
| 4   | Haiwei Wang         | 2007 | 71(36/35)    | NA     | acupuncture                          | placebo treatment                                      | 10                           |                   |
| 5   | Honglin Li          | 2007 | 61(31/30)    | 33-48  | acupuncture                          | <i>cannanxingkoufuye</i>                               | 30                           | 5                 |
| 6   | Caide Yang          | 2009 | 81(39/42)    | 21-50  | embedding                            | doxepin                                                | 45                           |                   |
| 7   | Danling Ye          | 2009 | 60(30/30)    | 20~-50 | acupuncture                          | <i>xiaoyaosan</i>                                      | 21                           |                   |
| 8   | Shengyou Xie        | 2009 | 60(30/30)    | 18-50  | electroacupuncture,auricular-plaster | zaorentang.ganmaidazaotang                             | 28                           |                   |
| 9   | Yaqi Guo            | 2009 | 60(30/30)    | 18-60  | acupuncture,auricular-plaster        | <i>guipitang</i>                                       | 28                           |                   |
| 10  | Chuanwei Chen       | 2010 | 53(27/26)    | 21-58  | acupuncture                          | placebo treatment                                      | 14                           |                   |
| 11  | Dongdong Wu         | 2010 | 30(15/15)    | 25-55  | acupuncture                          | <i>guipitang</i>                                       | 14                           |                   |
| 12  | Dongdong Wu         | 2010 | 62(31/31)    | 19-54  | acupuncture                          | <i>cannanxingkoufuye</i>                               | 28                           |                   |
| 13  | Haitao Wang         | 2010 | 64(32/32)    | 21-60  | acupuncture,moxibustion              | acupuncture                                            | 30                           |                   |
| 14  | Juan Du             | 2010 | 60(30/30)    | 20-55  | acupuncture,moxibustion              | <i>guipiwán</i>                                        | 30                           |                   |
| 15  | Wei Zhang           | 2010 | 45(22/23)    | 29-78  | acupuncture                          | placebo treatment                                      | 28                           |                   |
| 16  | Xingguo Li          | 2010 | 200(100/100) | 22-56  | acupuncture                          | <i>shiquandabutang</i>                                 | 28                           |                   |
| 17  | Yumin Lin           | 2010 | 60(30/30)    | 30-46  | acupuncture,moxibustion              | <i>guipiwán</i>                                        | 21                           | 3                 |
| 18  | Shenghui Zhen       | 2011 | 77(39/38)    | 35-43  | acupuncture                          | placebo treatment                                      | 28                           |                   |
| 19  | Xiaomin Rao         | 2011 | 63(33/30)    | 24-36  | moxibustion                          | chinese medicine                                       | 30                           |                   |
| 20  | Xiuling Chen        | 2011 | 60(30/30)    | 31-39  | moxibustion                          | vitamin                                                | 28                           |                   |
| 21  | Yimin Zhu           | 2012 | 60(30/30)    | 19-48  | abdominal acupuncture                | <i>xiaoyaosan</i>                                      | 17                           |                   |
| 22  | Yumin Lin           | 2012 | 100(50/50)   | NA     | acupuncture,moxibustion              | <i>guipiwán</i>                                        | 21                           |                   |
| 23  | Jin Yu              | 2013 | 60(30/30)    | 20~-50 | acupuncture                          | <i>xiaoyaosan</i>                                      | 21                           |                   |
| 24  | Qingmei Dai         | 2013 | 49(26/23)    | 30-55  | acupuncture,moxibustion              | <i>xiaoyaowan</i>                                      | 42                           |                   |
| 25  | Taiting Zhou        | 2013 | 99(33/33/33) | 27-53  | acupuncture,moxibustion              | <i>guipitang</i> (electroacupuncture)                  | 36                           |                   |
| 26  | Ying Wang           | 2013 | 80(40/40)    | 20-57  | moxibustion                          | fluoxetine hydrochloride                               | 20                           |                   |
| 27  | Fengyi Liu          | 2014 | 60(30/30)    | 26-40  | embedding                            | <i>xiaoyaowan</i>                                      | 90                           | 1                 |
| 28  | Lei Zhou            | 2014 | 142(72/70)   | 18-56  | embedding                            | <i>qijudihuangwan</i>                                  | 90                           |                   |
| 29  | Weiquan Zhong       | 2014 | 80(40/40)    | 22-40  | acupuncture,moxibustion              | electroacupuncture                                     | 40                           |                   |

|    |               |      |           |       |                         |                   |    |  |
|----|---------------|------|-----------|-------|-------------------------|-------------------|----|--|
| 30 | Yongxiu Liang | 2014 | 86(43/43) | 27-59 | embedding, moxibustion  | acupuncture       | 35 |  |
| 31 | Yuxuan Lai    | 2014 | 60(30/30) | 26-38 | acupuncture,moxibustion | <i>xiaoyaowan</i> | 28 |  |
