# Supplementary material for: Acupuncture and moxibustion for chronic fatigue syndrome in traditional Chinese medicine: a systematic review and meta-analysis
Source: Springer Nature journal article supplement (doi:10.1186/s12906-017-1647-x), 2017-03-23
Supplement: MOESM2 [file 12172220]

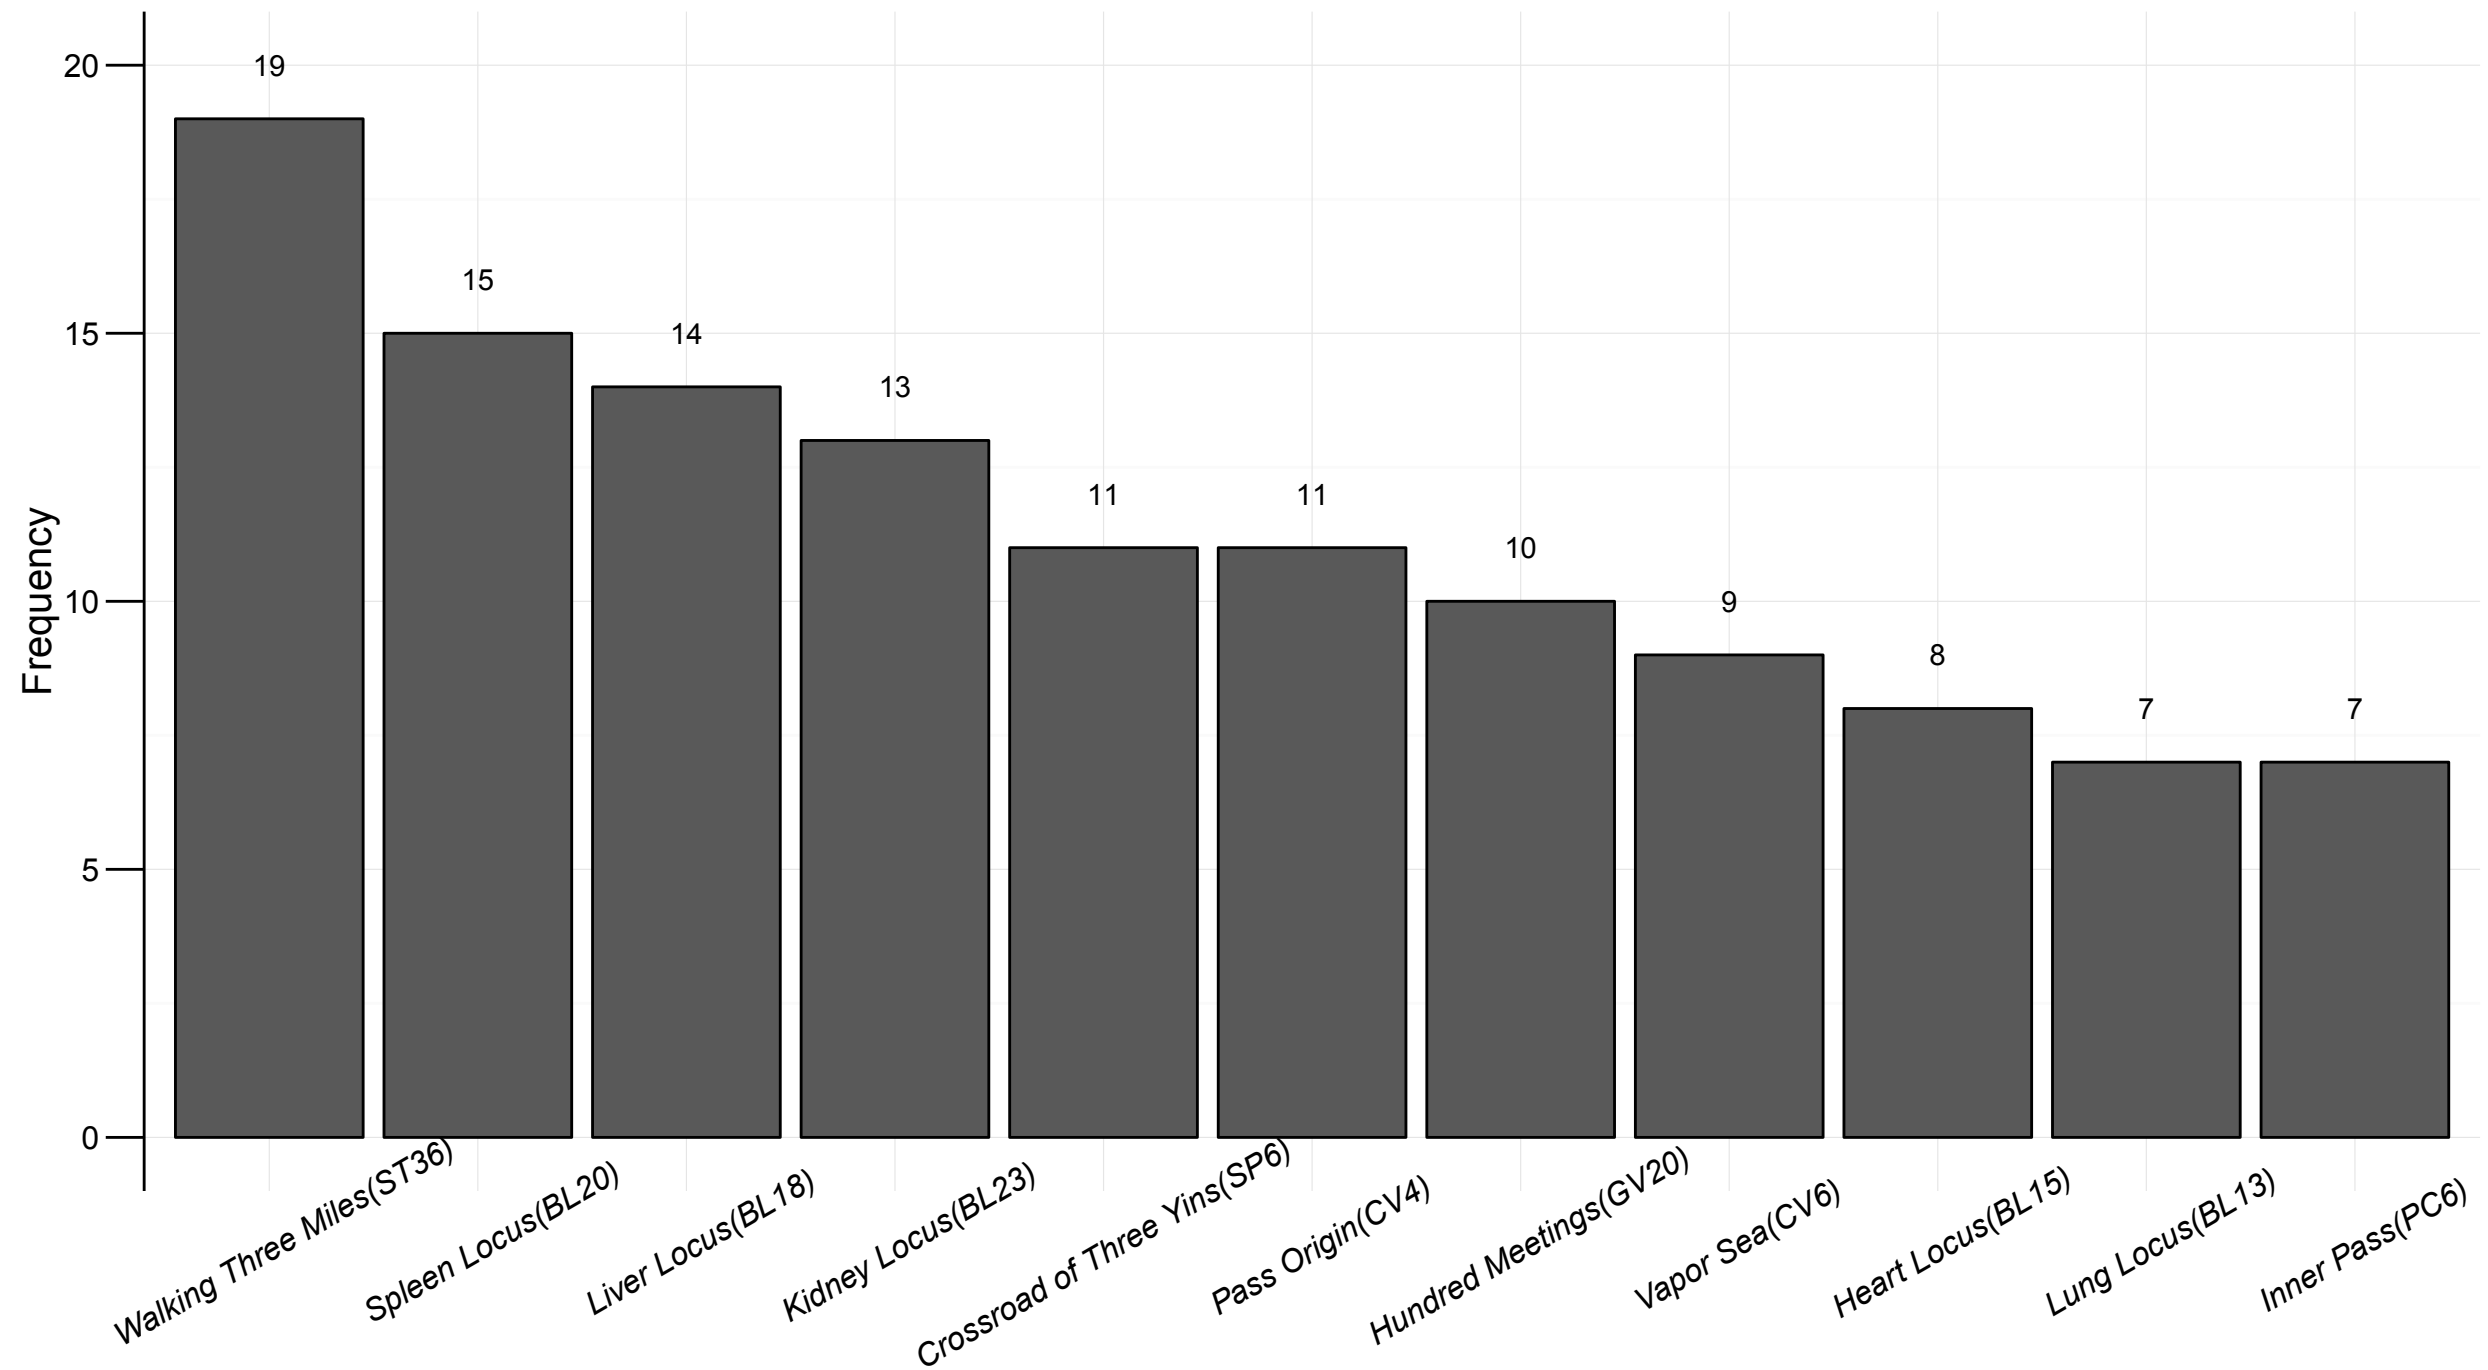

Fig.S1 The highest frequency acupoints adopted in studies
